# Supplementary material for: Fluorescence Labeling of Cellulose Nanocrystals—A Facile and Green Synthesis Route
Source: MDPI journal article supplement (doi:10.3390/polym14091820), 2022-04-29
Supplement: s1 [file s1]

# Fluorescence labeling of cellulose nanocrystals — a facile and green synthesis route

Lorenzo Donato Campora <sup>1,2</sup>, Christoph Metzger <sup>3</sup>, Stephan Dähnhardt-Pfeiffer <sup>4</sup>, Roland Drexel <sup>5</sup>, Florian Meier <sup>5</sup> and Siegfried Fürtauer <sup>2,\*</sup>

<sup>1</sup> Department of Civil and Industrial Engineering, University of Pisa, 56122 Pisa, Italy; l.campora@studenti.unipi.it

<sup>2</sup> Fraunhofer Institute for Process Engineering and Packaging IVV, 85354 Freising, Germany

<sup>3</sup> Chair of Process Systems Engineering, TUM School of Life Sciences Weihenstephan, Technical University of Munich, 85354 Freising, Germany; christoph.metzger@tum.de

<sup>4</sup> Microscopy Services Dähnhardt GmbH, 24220 Flintbek, Germany; spfeiffer@microscopy-consulting.com

<sup>5</sup> Postnova Analytics GmbH, 86899 Landsberg am Lech, Germany; roland.drexel@postnova.com; florian.meier@postnova.com

\* Correspondence: siegfried.fuertauer@ivv.fraunhofer.de; Tel.: +49-8161-491-526

**Table S1:** AF4 fractionation method for the separation of the CNC samples.

| AF4 - Method                                      |                |                                         |               |
|---------------------------------------------------|----------------|-----------------------------------------|---------------|
| detector flow rate (mL min <sup>-1</sup> )        | 0.3            |                                         |               |
| slot flow rate (mL min <sup>-1</sup> )            | 0.2            |                                         |               |
| injection flow rate (mL min <sup>-1</sup> )       | 0.2            |                                         |               |
| cross flow rate (initial) (mL min <sup>-1</sup> ) | 1              |                                         |               |
| delay time (min)                                  | 2              |                                         |               |
| injection time (min)                              | 6              |                                         |               |
| transition time (min)                             | 0.5            |                                         |               |
| Elution                                           | duration (min) | cross flow rate (mL min <sup>-1</sup> ) | program       |
| step 1                                            | 2              |                                         | 1 constant    |
| step 2                                            | 40             |                                         | 1 power (0.2) |
| step 3                                            | 40             |                                         | 0.1 constant  |
| rinse step                                        | 15             |                                         | 0             |

**Table S2:** pH values at different steps of the synthesis of CNC-APTES.

|             | Time (min)                                                    | 0                          | 10                    | 20                      | 40                           | 45                     | 225                            |
|-------------|---------------------------------------------------------------|----------------------------|-----------------------|-------------------------|------------------------------|------------------------|--------------------------------|
| Sample      | Preparation                                                   | pH CNC dispersion (1 wt.%) | pH after HCl addition | pH after APTES addition | pH after hydrolysis of APTES | pH after NaOH addition | pH after condensation of APTES |
| CNC-APTES-1 | Protocol according to [75]                                    | 6.5                        | 4.54                  | 10.42                   | 10.42                        | 10.81                  | 10.66                          |
| CNC-APTES-2 | pH establishment during hydrolysis                            | 7.8                        | 1.58                  | 8.93                    | 3.17                         | 10.07                  | 10.04                          |
| CNC-APTES-3 | Optimized protocol (25 °C) for further FITC-functionalization | 7.6                        | 1.48                  | 2.46                    | 2.46                         | 10.19                  | 10.11                          |
| CNC-APTES-4 | Increased condensation temperature (40 °C)                    | 7.48                       | 1.42                  | 2.29                    | 2.29                         | 10.12                  | 10.12                          |

**Table S3:** Concentrations of FITC in washing water (CNC-APTES-FITC-3).

| Washing step (N) | Volume supernatant (ml) | $c$ (FITC) ( $\mu\text{mol L}^{-1}$ ) | Ratio $c(N)/c(N+1)$ | Removed amount per step N; $n$ (FITC) ( $\mu\text{mol}$ ) | Removed ratio FITC (%) per step N | Removed amount $n$ (FITC) ( $\mu\text{mol}$ ) total | Removed ratio FITC (%) total |
|------------------|-------------------------|---------------------------------------|---------------------|-----------------------------------------------------------|-----------------------------------|-----------------------------------------------------|------------------------------|
| 0                | 16.175                  | 289.2                                 | 1.6                 | 4.68                                                      | 29.1                              | 4.68                                                | 29.1                         |
| 1                | 16.3                    | 178.4                                 | 3.3                 | 2.91                                                      | 18.1                              | 7.59                                                | 47.3                         |
| 2                | 20.15                   | 54.0                                  | 3.4                 | 1.09                                                      | 6.8                               | 8.67                                                | 54.0                         |
| 3                | 19.63                   | 16.0                                  | 3.2                 | 0.31                                                      | 2.0                               | 8.99                                                | 56.0                         |
| 4                | 19.79                   | 5.0                                   | 3.1                 | 0.10                                                      | 0.6                               | 9.09                                                | 56.6                         |
| 5                | 20.38                   | 1.6                                   | 2.8                 | 0.03                                                      | 0.2                               | 9.12                                                | 56.8                         |
| 6                | 20.86                   | 0.6                                   |                     | 0.01                                                      | 0.1                               | 9.13                                                | 56.9                         |

**Table S4:** Detailed description of IR modes of CNC, CNC-APTES-3 and CNC-APTES-FITC-3

| IR mode                                                          | Reference  | Wavenumber $\nu$ (cm <sup>-1</sup> ) | Visible in... |             |                  |
|------------------------------------------------------------------|------------|--------------------------------------|---------------|-------------|------------------|
|                                                                  |            |                                      | CNC           | CNC-APTES-3 | CNC-APTES-FITC-3 |
| O-H stretching: O(3)H...O(5) intramolecular                      | [82,84]    | 3340                                 | x             | x           | x                |
| O-H stretching: O(6)H...O(3) intramolecular                      | [82,84]    | 3272                                 | x             | x           | x                |
| C-H (>CH-) stretching                                            | [82,83]    | 2895                                 | x             | x           | x                |
| Lactone 5-membered-ring                                          | [86]       | 1775                                 |               |             | x                |
| C=O stretching                                                   | [82]       | 1720                                 |               |             | x                |
| H-O-H bending: adsorbed water                                    | [71,83]    | 1648                                 | x             | x           | x                |
| C-H (CH <sub>2</sub> -pyranose ring) scissoring                  | [82-84]    | 1429                                 | x             | x           | x                |
| C-H (>CH-) deformation vibration                                 | [71,82-84] | 1370                                 | x             | x           | x                |
| organic sulfate                                                  | [82]       | 1335                                 | x             | x           | x                |
| CH <sub>2</sub> wagging                                          | [84]       | 1310                                 | x             | x           | x                |
| organic sulfate: Asymmetric/symmetric SO <sub>2</sub> stretching | [82]       | 1200                                 | x             | x           | x                |
| C-O-C asymmetric valence vibration                               | [82,84]    | 1162                                 | x             | x           | x                |
| Ring asymmetric valence vibration                                | [84]       | 1105                                 | x             | x           | x                |
| C-O valence vibration mainly from C3-O3H                         | [84]       | 1055                                 | x             | x           | x                |
| C-O-C pyranose ring vibration                                    | [83]       | 1030                                 | x             | x           | x                |
| Si-O-Si                                                          | [85]       | 980                                  |               | x           | x                |
| beta-glycosidic linkage between glucose units in cellulose       | [83,84]    | 895                                  | x             | x           | x                |
| aromatic C-H out-of-plane bending                                | [82]       | 875                                  |               |             | x                |
| Si-C                                                             | [75]       | 845                                  |               | x           | x                |
| O-H out-of-plane bending                                         | [82-84]    | 665                                  | x             | x           | x                |

Blue: characteristic bands for modified CNC (CNC-APTES-3 and CNC-APTES-FITC-3)

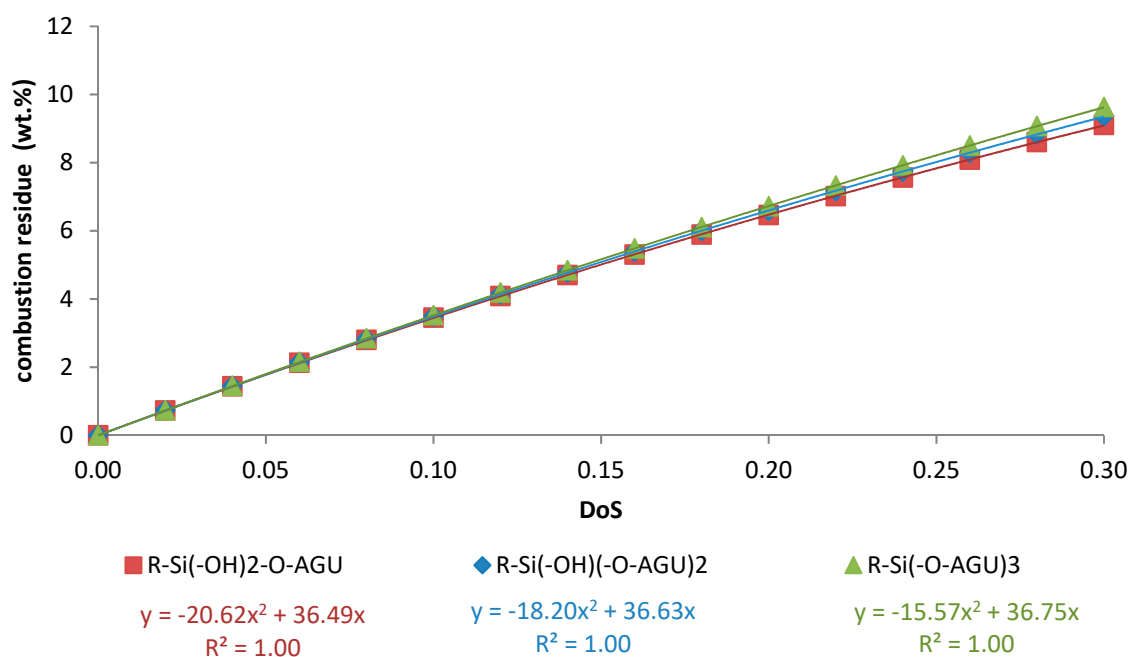

**Figure S1:** Relation between combustion residue (wt.%) of CNC-APTES and DoS.

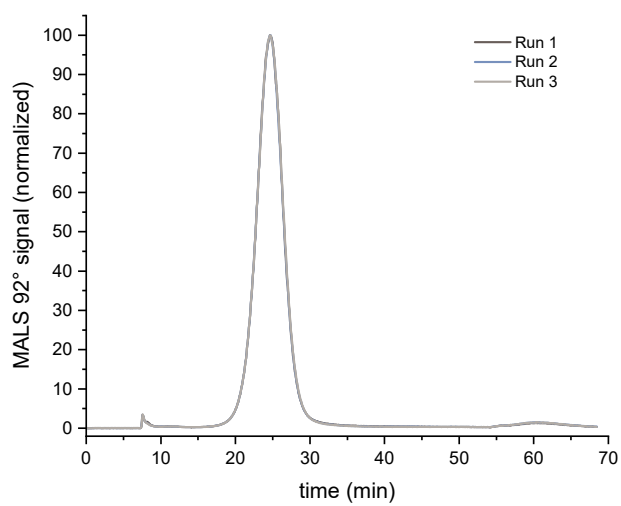

**Figure S2:** Fractograms of triplicate separation of polystyrene beads (size standards with  $D = 62 \text{ nm} \pm 4 \text{ nm}$ , NanoSphere™ 3060A Thermo Scientific™). Retention time of the peak maximum was used to determine the effective channel height =  $331.41 \text{ } \mu\text{m} \pm 0.13 \text{ } \mu\text{m}$ .

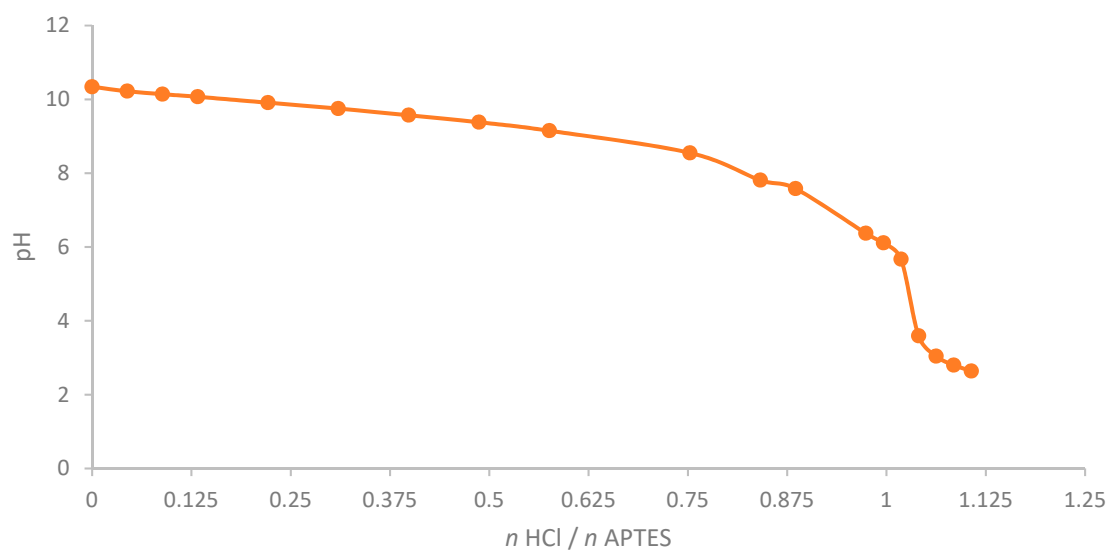

**Figure S3 (a)** Titration of APTES with HCl 0.5 mol L<sup>-1</sup>.

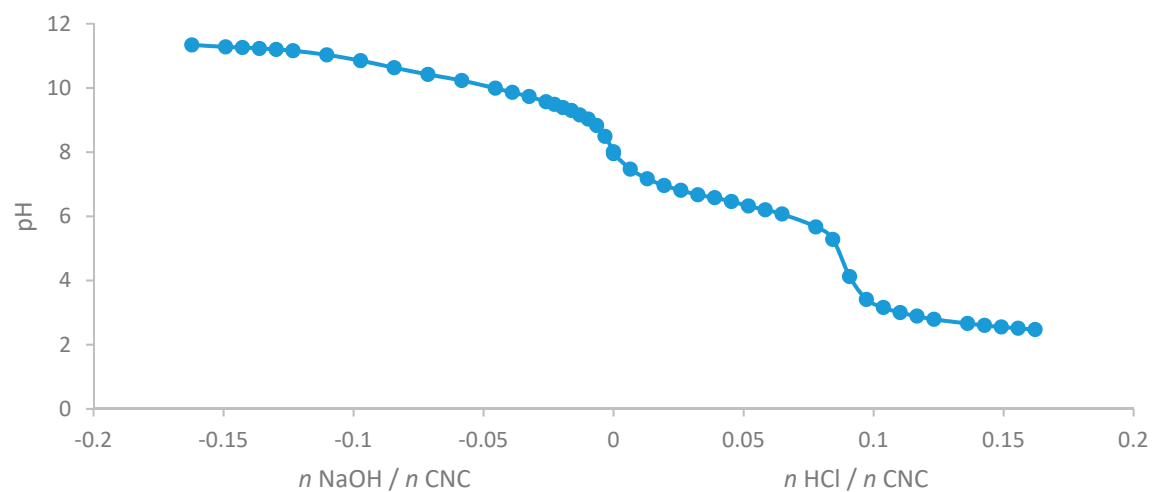

**Figure S3 (b)** Titration of CNCs with NaOH 0.1 mol L<sup>-1</sup> (negative x axis) and HCl 0.1 mol L<sup>-1</sup> (positive x axis).

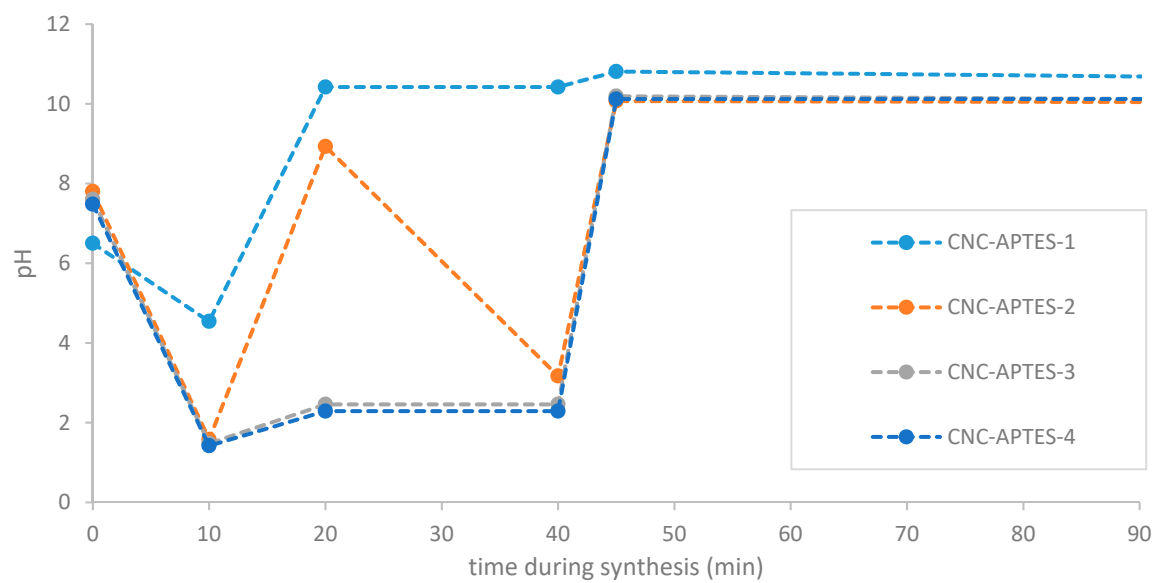

**Figure S4:** pH values at different steps of the synthesis of CNC-APTES.

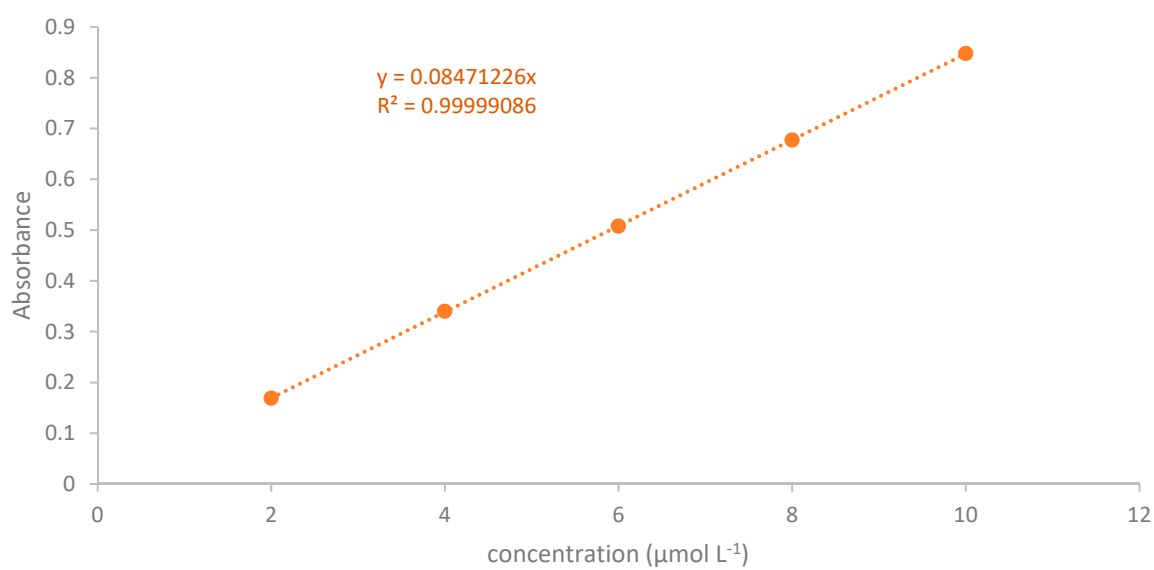

**Figure S5:** Calibration of FITC in buffer for photometry (at 495 nm).

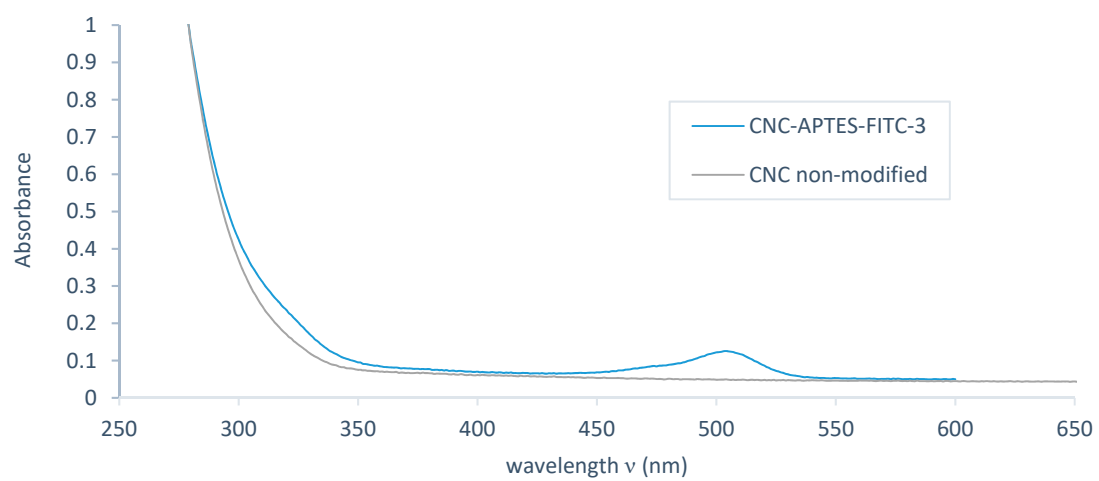

**Figure S6:** Spectrum of CNC non-modified and CNC-APTES-FITC-3.
